# Supplementary material for: Variable skeletal phenotypes associated with biallelic variants in PRKG2
Source: PubMed Central journal article supplement (PMC9554069; doi:10.1136/jmedgenet-2021-108027), 2021-11-15
Supplement: jmedgenet-2021-108027supp001.pdf [file jmedgenet-2021-108027supp001.pdf]

**Table S2: Clinical details and variant information for four individuals from two independent families with biallelic variants in PRKG2. Results are compared to two cases reported by Díaz-González et al 2020.** Sequencing methods in Family 2 are as described by Pagnamenta et al 2021. NA, not available; ROH, region of homozygosity. Variant annotation is based on NM\_006259.3. SDs for adults heights were calculated using <https://tall.life/height-percentile-calculator-age-country>. For Family 1 we used the mean adult height obtained from the Royal College of Paediatrics and Child Health's standard growth chart.

| Family/individual ID                           | Families reported here                                                                                                                              |                                                                                                                                                 |                                                                                                           |                                                                         | Díaz-González et al 2020                                                                                                                                                                                                                                                                               |                                                                                                                                                                                                                                                                                                                        |
|------------------------------------------------|-----------------------------------------------------------------------------------------------------------------------------------------------------|-------------------------------------------------------------------------------------------------------------------------------------------------|-----------------------------------------------------------------------------------------------------------|-------------------------------------------------------------------------|--------------------------------------------------------------------------------------------------------------------------------------------------------------------------------------------------------------------------------------------------------------------------------------------------------|------------------------------------------------------------------------------------------------------------------------------------------------------------------------------------------------------------------------------------------------------------------------------------------------------------------------|
|                                                | Family 1                                                                                                                                            |                                                                                                                                                 | Family 2                                                                                                  |                                                                         | Proband 1                                                                                                                                                                                                                                                                                              | Proband 2                                                                                                                                                                                                                                                                                                              |
| Consanguinity (parental relationship)          | Yes (double 1st cousins)                                                                                                                            |                                                                                                                                                 | Yes (double 2nd cousins)                                                                                  |                                                                         | Yes (3rd cousins)                                                                                                                                                                                                                                                                                      | Yes (3rd cousins)                                                                                                                                                                                                                                                                                                      |
| Ethnicity                                      | Pakistani                                                                                                                                           |                                                                                                                                                 | Iranian                                                                                                   |                                                                         | Moroccan                                                                                                                                                                                                                                                                                               | Indian                                                                                                                                                                                                                                                                                                                 |
| Parents' stature                               | Father 177 cm (0 SD);<br>Mother 160 cm (-0.60 SD)                                                                                                   |                                                                                                                                                 | Father 155 cm (-1.10 SD);<br>Mother 171 cm (1.90 SD)                                                      |                                                                         | Father 165 cm (-1.75 SD);<br>Mother 164 cm (-0.01 SD)                                                                                                                                                                                                                                                  | Father 158 cm (-2.59 SD);<br>Mother 147 cm (-2.50 SD)                                                                                                                                                                                                                                                                  |
| Individual                                     | IV-3                                                                                                                                                | IV-6                                                                                                                                            | IV-7                                                                                                      | V-3                                                                     | II-2                                                                                                                                                                                                                                                                                                   | II-2                                                                                                                                                                                                                                                                                                                   |
| Gender (M/F)                                   | M                                                                                                                                                   | M                                                                                                                                               | M                                                                                                         | F                                                                       | F                                                                                                                                                                                                                                                                                                      | F                                                                                                                                                                                                                                                                                                                      |
| Age at first referral                          | 13 years                                                                                                                                            |                                                                                                                                                 | 2 years                                                                                                   |                                                                         | 3 years                                                                                                                                                                                                                                                                                                |                                                                                                                                                                                                                                                                                                                        |
| Referral reason                                | Diagnosis due to sibling                                                                                                                            | Poor weight gain, unusual limb proportions, hypotonia, large head                                                                               | Short stature                                                                                             | Short stature/dysmorphism                                               | Short stature/suspected skeletal dysplasia                                                                                                                                                                                                                                                             | Short stature/suspected skeletal dysplasia                                                                                                                                                                                                                                                                             |
| Homozygous variant                             | c.2282dupA; p.(Asp761Glufs*34)                                                                                                                      |                                                                                                                                                 | c.1705C>T; p.(Arg569*)                                                                                    |                                                                         | c.1705C>T; p.(Arg569*)                                                                                                                                                                                                                                                                                 | c.491dupA; p.(Asn164Lysfs*2)                                                                                                                                                                                                                                                                                           |
| Allele Frequency (gnomAD 2.1.1)                | Absent                                                                                                                                              |                                                                                                                                                 | 1/250704                                                                                                  |                                                                         | 1/250704                                                                                                                                                                                                                                                                                               | Absent                                                                                                                                                                                                                                                                                                                 |
| ROH region GRCh38 (size, rank)                 | NA                                                                                                                                                  | chr4:25,732,624-85,677,887 (60.0Mb, #1)                                                                                                         | chr4:53,687,014-85,677,887 (32.0Mb, #3)                                                                   | chr4: 30,724,365-89,247,731 (58.5Mb)                                    | NA                                                                                                                                                                                                                                                                                                     | NA                                                                                                                                                                                                                                                                                                                     |
| Hypotonia                                      | NA                                                                                                                                                  | Yes                                                                                                                                             | N/A                                                                                                       | No                                                                      | -                                                                                                                                                                                                                                                                                                      | -                                                                                                                                                                                                                                                                                                                      |
| Birth weight                                   | 2700 g                                                                                                                                              | N/A                                                                                                                                             | N/A                                                                                                       | 3350 g                                                                  | NA                                                                                                                                                                                                                                                                                                     | NA                                                                                                                                                                                                                                                                                                                     |
| Birth length                                   | N/A                                                                                                                                                 | N/A                                                                                                                                             | N/A                                                                                                       | 50 cm                                                                   | NA (-1.93 SDs at 3 weeks)                                                                                                                                                                                                                                                                              | NA                                                                                                                                                                                                                                                                                                                     |
| Birth OFC                                      | N/A                                                                                                                                                 | N/A                                                                                                                                             | N/A                                                                                                       | 34 cm                                                                   | NA (-0.42 SDs at 3 weeks)                                                                                                                                                                                                                                                                              | NA                                                                                                                                                                                                                                                                                                                     |
| Developmental milestones                       | Normal                                                                                                                                              | Normal                                                                                                                                          | Normal                                                                                                    | Normal                                                                  | Normal                                                                                                                                                                                                                                                                                                 | Normal                                                                                                                                                                                                                                                                                                                 |
| Growth / feeding                               | No concerns until 4y                                                                                                                                | Poor feeder                                                                                                                                     | NA                                                                                                        | Normal                                                                  | NA                                                                                                                                                                                                                                                                                                     | NA                                                                                                                                                                                                                                                                                                                     |
| Age at last assessment (years)                 | 26                                                                                                                                                  | 22                                                                                                                                              | 15                                                                                                        | 10                                                                      | 12                                                                                                                                                                                                                                                                                                     | 11                                                                                                                                                                                                                                                                                                                     |
| Height (Percentile/SD)                         | 158.5 cm (-2.5 SD)                                                                                                                                  | 140.8 cm (-4.9 SD)                                                                                                                              | 143.8 cm (-3.11 SD)                                                                                       | 121 cm (-2.5 SD)                                                        | -4.01 SD                                                                                                                                                                                                                                                                                               | -5.06 SD                                                                                                                                                                                                                                                                                                               |
| Sitting height (cm)                            | 85                                                                                                                                                  | 76                                                                                                                                              | 77                                                                                                        | 70                                                                      | NA                                                                                                                                                                                                                                                                                                     | NA                                                                                                                                                                                                                                                                                                                     |
| Leg length                                     | NA                                                                                                                                                  | -2 to -3 SD                                                                                                                                     | NA                                                                                                        | 53                                                                      | NA                                                                                                                                                                                                                                                                                                     | NA                                                                                                                                                                                                                                                                                                                     |
| Skeletal proportions                           | Mild rhizomelia of upper and lower limbs                                                                                                            | Moderate rhizomelia of upper and lower limbs                                                                                                    | Mild rhizomelia of upper and lower limbs                                                                  | Rhizomelic shortening of the upper and lower extremities.               | Mild mesomelic shortening of the limbs (lower limbs, radius and ulna); sitting height to height ratio was 0.579 (1.21 SDs)                                                                                                                                                                             | No (upper to lower segment ratio 1.41 aged 11y)                                                                                                                                                                                                                                                                        |
| OFC (centile)                                  | 50-75th                                                                                                                                             | 50-75th                                                                                                                                         | 50-75th                                                                                                   | 56cm                                                                    | -                                                                                                                                                                                                                                                                                                      | -                                                                                                                                                                                                                                                                                                                      |
| Kyphosis                                       | Yes, mild, thoracic region                                                                                                                          | Yes, mild, mid-thoracic                                                                                                                         | -                                                                                                         | No                                                                      | -                                                                                                                                                                                                                                                                                                      | -                                                                                                                                                                                                                                                                                                                      |
| Digital anomalies                              | Normal except for broad thumbs and short 4-5th metacarpals                                                                                          | Normal except for broad thumbs                                                                                                                  | -                                                                                                         | Short, broad fingers                                                    | Short, stubby fingers                                                                                                                                                                                                                                                                                  | Short stubby fingers                                                                                                                                                                                                                                                                                                   |
| Acromelia                                      | No                                                                                                                                                  | No                                                                                                                                              | No                                                                                                        | No                                                                      | -                                                                                                                                                                                                                                                                                                      | -                                                                                                                                                                                                                                                                                                                      |
| Feet                                           | Flat feet                                                                                                                                           | NA                                                                                                                                              | Mild shortening of toes (Figure S3A bottom)                                                               | Short broad toes                                                        | -                                                                                                                                                                                                                                                                                                      | Sandal gap                                                                                                                                                                                                                                                                                                             |
| Facial appearance                              | Normal                                                                                                                                              | Triangular face, when younger                                                                                                                   | Normal                                                                                                    | Broad nasal bridge, thick eyebrows, synophrys, prominent chin           | Normal                                                                                                                                                                                                                                                                                                 | Triangular face, broad nasal bridge, pointed chin, synophrys, hypertelorism, low set ears.                                                                                                                                                                                                                             |
| Cranial findings                               | NA                                                                                                                                                  | Multiple Wormian bones                                                                                                                          | NA                                                                                                        | Normal                                                                  | Normal                                                                                                                                                                                                                                                                                                 | Normal                                                                                                                                                                                                                                                                                                                 |
| Palate                                         | Normal                                                                                                                                              | Normal                                                                                                                                          | Normal                                                                                                    | Normal                                                                  | -                                                                                                                                                                                                                                                                                                      | -                                                                                                                                                                                                                                                                                                                      |
| Platyospondyly                                 | Yes                                                                                                                                                 | Yes                                                                                                                                             | Yes (mild)                                                                                                | Yes                                                                     | Yes (mild flattening of the thoracic vertebral bodies)                                                                                                                                                                                                                                                 | Moderate platyspondyly with anterior beaking of vertebral borders of dorsolumbar spine                                                                                                                                                                                                                                 |
| Metaphyseal changes                            | Yes (widespread)                                                                                                                                    | Yes                                                                                                                                             | Yes (broadened and irregular)                                                                             | Yes                                                                     | -                                                                                                                                                                                                                                                                                                      | Long bones showed relatively large epiphyses and widening, with some irregularity of the metaphyses. Metaphyseal irregularity of metacarpals/metatarsals                                                                                                                                                               |
| Other radiological findings                    | -                                                                                                                                                   | Slender bones with thin cortices, mild bowing of femur, small irregular femoral heads                                                           | -                                                                                                         | Short metacarp and metatarsal + disostosis peripheral                   | Mild thoracic scoliosis, lumbar hyperlordosis, short pedicles of the lumbar spine, very mild flaring of the metaphyses and mild genu valgum. Growth plate of knee was prematurely fused, radius and ulna mildly bowed; short broad phalanges and metacarpals (especially 3-5th), all prematurely fused | Prominent deltoid tuberosities of the humeri, short and broad phalanges, ilia short with flaring of the iliac wings, vertebral alterations less prominent and restricted to the thoracic region with mild shortening of the pedicles of her lumbar spine. Pelvic radiograph showed minor irregularity of the acetabula |
| Bone age                                       | Delayed                                                                                                                                             | NA                                                                                                                                              | NA                                                                                                        | No delay (9 years at calendar age of 9)                                 | Advanced (+2.6 SD)                                                                                                                                                                                                                                                                                     | Within normal limits                                                                                                                                                                                                                                                                                                   |
| Bone density                                   | Normal                                                                                                                                              | NA                                                                                                                                              | Normal                                                                                                    | NA                                                                      | NA                                                                                                                                                                                                                                                                                                     | NA                                                                                                                                                                                                                                                                                                                     |
| Suggested diagnoses prior to genetic diagnosis | Spondylometaphyseal dysplasia (SMD)-type not classified                                                                                             | Spondylometaphyseal dysplasia (SMD)-type not classified and Osteogenesis imperfecta type 1                                                      | Spondylometaphyseal dysplasia (SMD)-type not classified                                                   | Pseudoachondroplasia                                                    | Similar to AMDM but with milder radiological phenotype, no cone-shaped epiphyses in the hands and relatively mild mesomelia                                                                                                                                                                            | -                                                                                                                                                                                                                                                                                                                      |
| Other information                              | -                                                                                                                                                   | Multiple fractures (arm as infant, wrist aged 8y, wedge T6 vertebra), blue sclerae                                                              | -                                                                                                         | Constipation, umbilical hernia in the past (now normal), hypertrichosis | -                                                                                                                                                                                                                                                                                                      | Hirsutism, prominent costochondral cartilages, sternal prominence, widening of wrists, genu varum                                                                                                                                                                                                                      |
| Cardiovascular                                 | -                                                                                                                                                   | -                                                                                                                                               | -                                                                                                         | Normal                                                                  | Complete atrioventricular block (Mobitz Ila)                                                                                                                                                                                                                                                           | -                                                                                                                                                                                                                                                                                                                      |
| Treatment                                      | Good response seen in 6m GH trial aged 14 and a half years. During this time his annual growth velocity increased significantly (3.4 to 7.6 cm/yr). | Pamidronate                                                                                                                                     | Successful trial of Growth Hormone (treatment ongoing) and showing good response (currently 4.6 cm/year). | Somatropin injections (3 months)                                        | Femoral and humeral limb lengthening                                                                                                                                                                                                                                                                   | -                                                                                                                                                                                                                                                                                                                      |
| Sequencing method                              | Sanger sequencing                                                                                                                                   | 150 bp paired end sequencing on HiSeq as part of 100K Genomes Project, TruSeq PCR-Free High Throughput library. Sequenced with parents as quod. | -                                                                                                         | Exome sequencing as described previously (PMID: 33559681)               | Trio exome sequencing using Sure Select Human All exon V6 targeted capture (Agilent Technologies), paired-end 150 bp sequencing on NovaSeq6000                                                                                                                                                         | Nextera Expanded exome kit (Illumina) and paired-end 100 bp sequencing on a HiSeq2000                                                                                                                                                                                                                                  |
| Genetic testing prior to WGS/exome             | -                                                                                                                                                   | COL1A1/COL1A2 testing detected COL1A1: NM_000088.4:c.1770del; p.(Glu591Serfs*175) de novo. Normal karyotype.                                    | Array CGH (60K), SHOX sequencing and MLPA all normal                                                      | -                                                                       | Custom-designed NGS skeletal dysplasia panel (327 genes)                                                                                                                                                                                                                                               | -                                                                                                                                                                                                                                                                                                                      |
